# Supplementary material for: A Genome-Wide RNAi Screen Reveals MAP Kinase Phosphatases as Key ERK Pathway Regulators during Embryonic Stem Cell Differentiation
Source: PLoS Genet. 2012 Dec 13;8(12):e1003112. doi: 10.1371/journal.pgen.1003112 (PMC3521700; doi:10.1371/journal.pgen.1003112)
Supplement: Table S4 — Positive hits identified in both of the validation siRNA screens for genes involved in escape from pluripotency. These hits scored positive in validation screens with both Rex1GFPd2 and Oct4GFP cells and were considered as a high confidence group for further analysis. (XLS) [file pgen.1003112.s018.xls]

## Sheet: high confidence dataset
Ranking	Offical_Gene_Symbol	Alternative_symbols	Entrez_Gene_ID	RefSeq_mRNA	Gene_Name	primary_ava	primary_se		rex1_ava	rex1_se		oct4_ava	oct4_se
1	tcf7l1	tcf3	21415	NM_009332	transcription factor 3	6.92946	0.843677		2.69843	0.115525		1.8718	0.0109767
2	chaf1a	chaf1a	27221	NM_013733	chromatin assembly factor 1, subunit A (p150)	5.56613	0.316356		2.52577	0.410187		1.58416	0.327934
3	nr0b1	nr0b1	11614	NM_007430	nuclear receptor subfamily 0, group B, member 1	5.21694	1.80433		2.40522	0.239376		3.77068	0.206012
4	mbd3	mbd3	17192	NM_013595	methyl-CpG binding domain protein 3	4.10006	0.053471		2.31028	0.281195		1.6565	0.0386017
5	pou5f1	oct4; pou5f1	18999	NM_013633	POU domain, class 5, transcription factor 1	6.06537	2.8358		2.21728	0.000511409		2.65973	1.01661
6	dpy30	2810410m20rik(dyp30),gm2059	66310	NM_024428	2810410M20RIK(Dyp30)	2.11801	0.518968		2.19237	0		1.69055	0.675828
7	cnot8	cnot8	69125	NM_026949	CCR4-NOT transcription complex, subunit 8	3.62395	0.259184		2.06965	0.0955763		1.88959	0.548619
8	psmd11	psmd11,gm14048	69077	NM_178616	predicted gene 14048; proteasome (prosome, macropain) 26S subunit, non-ATPase, 11	2.64644	0.166907		1.86491	0.220165		2.4506	0.151705
9	en2	en2	13799	NM_010134	engrailed 2	2.54063	0.080401		1.84665	0.140194		2.2654	0.286598
10	psmd3	psmd3	22123	NM_009439	proteasome (prosome, macropain) 26S subunit, non-ATPase, 3	2.93229	0.118938		1.83183	0.0357422		2.13505	0.0511691
11	psmd2	psmd2,gm5422	21762	NM_134101	predicted gene 5422; proteasome (prosome, macropain) 26S subunit, non-ATPase, 2	3.1226	0.187401		1.80974	0.165003		3.06154	0.0454636
12	jarid2	jarid2	16468	NM_021878	jumonji, AT rich interactive domain 2	2.03829	0		1.80444	0.14371		1.9945	0.443709
13	ctbp2	ctbp2	13017	NM_009980	C-terminal binding protein 2	2.43963	0.105579		1.7866	0.0502537		3.49588	0.0375932
14	shfm1	shfm1	20422	NM_009169	split hand/foot malformation (ectrodactyly) type 1	10.0514	2.76115		1.73441	0.146812		5.68967	2.12498
15	psmd14	psmd14	59029	NM_021526	proteasome (prosome, macropain) 26S subunit, non-ATPase, 14	4.21405	0.29943		1.71808	0.0483881		1.29863	0.00271629
16	psmd8	psmd8	57296	NM_026545	proteasome (prosome, macropain) 26S subunit, non-ATPase, 8	2.5186	0.106005		1.70963	0.0617289		2.63806	0.0369484
17	psmc6	psmc6	67089	NM_025959	proteasome (prosome, macropain) 26S subunit, ATPase, 6	3.13552	0.241983		1.67987	0.011347		2.14595	0.230181
18	bcor	bcor	71458	NM_029510	BCL6 interacting corepressor	2.96926	0.172658		1.65829	0.100908		2.08293	0.0994684
19	rbbp4	mrbap48; rbbp4	19646	NM_009030	retinoblastoma binding protein 4	3.11919	0.433083		1.64554	0.152625		2.3249	0.125586
20	zbtb17	miz1; zfp100	22642	NM_009541	zinc finger and BTB domain containing 17	3.89354	0.242688		1.62677	0.102041		1.28848	0.0474194
21	psmc2	psmc2	19181	NM_011188	proteasome (prosome, macropain) 26S subunit, ATPase 2	2.10703	0.0564311		1.60261	0.111732		2.99913	0.250126
22	psmd6	psmd6	66413	NM_025550	proteasome (prosome, macropain) 26S subunit, non-ATPase, 6	3.65952	0.686363		1.57288	0.277453		1.42279	0.343744
23	ddx6	ddx6	13209	NM_007841	DEAD (Asp-Glu-Ala-Asp) box polypeptide 6	5.93991	0.293017		1.57235	0.0945196		1.69862	0.173159
24	fasn	fasn	14104	NM_007988	fatty acid synthase	2.81131	1.30553		1.55146	0.0856951		1.88371	0.39237
25	psmc5	psmc5	19184	NM_008950	SUG; protease (prosome, macropain) 26S subunit, ATPase 5	2.73278	0.0805644		1.54034	0.11956		1.99472	0.108255
26	jun	jun oncogene	16476	NM_010591	Jun oncogene	2.69166	0		1.50505	0.0613731		1.91798	0.324435
27	stat5a	stat5a	20850	NM_011488	signal transducer and activator of transcription 5A	2.36943	0.227008		1.47356	0.160995		1.59439	0.0786308
28	rqcd1	rqcd1	58184	NM_021383	rcd1 (required for cell differentiation) homolog 1 (S. pombe)	2.31614	0.26474		1.45831	0.056118		1.45404	0.0807974
29	pou6f2	pou6f2; d130006k24rik,loc100044260	218030	NM_175006	POU domain, class 6, transcription factor 2	2.28234	0.0645829		1.4117	0.00950256		1.20778	0.0677843
30	ddx5	ddx5,gm12183	432554, 13207	NM_007840	DEAD (Asp-Glu-Ala-Asp) box polypeptide 5; predicted gene 12183	2.67282	0.321811		1.39176	0.0162756		1.42482	0.163486
31	ikbkap	ikbkap	230233	NM_026079	inhibitor of kappa light polypeptide enhancer in B-cells, kinase complex-associated protein	2.67321	0.00428353		1.38999	0.00813276		1.49456	0.253544
32	suz12	suz12; d11ertd530e	52615	NM_199196	suppressor of zeste 12 homolog (Drosophila)	3.6164	0.398877		1.38765	0.0560282		1.21048	0.0104815
33	wbp7	wbp7; 2610014h22rik	75410	NM_029274	WW domain binding protein 7	2.53544	0.269587		1.37108	0.0396514		1.53696	0.0904178
34	sertad1	sertad1	55942	NM_018820	SERTA domain containing 1	2.40363	0.393303		1.36936	0.0212389		1.94847	0.334727
35	topors	topors	106021	NM_134097	topoisomerase I binding, arginine/serine-rich	2.55578	0.0393393		1.36313	0.0771881		1.37287	0.0436542
36	h3f3b	h3f3a,b,cgm*	100039203	NM_008211	H3 histone, family 3A/B; predicted gene 14383;	2.44281	0.192965		1.35502	0		1.49168	0.226512
37	ep400	ep400	75560	NM_029337	E1A binding protein p400	3.01578	0.558524		1.34123	0.00689914		4.94589	0.213736
38	psmb2	psmb2	26445	NM_011970	proteasome (prosome, macropain) subunit, beta type 2	2.45197	0.719617		1.31011	0.112296		2.34492	0.0891731
39	napepld	napepld	242864	NM_178728	N-acyl phosphatidylethanolamine phospholipase D	3.59157	0.0142931		1.3083	0.0261441		1.6405	0.00295154
40	atf7	atf7	223922	NM_146065	activating transcription factor 7	2.37326	0.29144		1.30575	0.0875778		1.22324	0.18737
41	gata3	gata3	14462	NM_008091	GATA binding protein 3	4.47359	1.1261		1.29472	0.0674029		1.5167	0.149048
42	ik	ik	24010	NM_011879	IK cytokine	2.64426	1.17551		1.2888	0.222601		1.49901	0.101034
43	tgif2	tgif2,gm7148	634967, 228839, 625574	NM_173396	TGFB-induced factor homeobox 2; predicted gene, OTTMUSG00000007704; similar to TGFB-induced factor 2	2.5152	0.138519		1.28833	0.0487648		1.48428	0.248464
44	gmnn	gmnn	57441	NM_020567	geminin	2.7355	0.120786		1.28775	0.27446		2.45859	0.120424
45	sox1	sox1	20664	NM_009233	SRY-box containing gene 1	2.97158	0.770649		1.28275	0.116348		1.29104	0.0847136
46	cmtm8	cmtm8	70031	NM_027294	CKLF-like MARVEL transmembrane domain containing 8	2.36076	0.326483		1.28268	0.28607		1.25533	0.0618009
47	psma1	psma1	26440	NM_011965	proteasome (prosome, macropain) subunit, alpha type 1	4.1983	1.20331		1.27845	0.013572		1.34139	0.235557
48	dr1	nc2; dr1	13486	NM_026106	down-regulator of transcription 1	4.51066	0.354179		1.27665	0.0386989		1.81534	0.131986
49	robld3	robld3	83409	NM_031248	roadblock domain containing 3	7.20777	2.23569		1.26238	0.00855238		5.70531	0.0901013
50	raf1	raf1	110157	NM_029780	v-raf-leukemia viral oncogene 1	4.89305	0.392299		1.26028	0.112847		1.25473	0
51	rgs13	rgs13	246709	NM_153171	regulator of G-protein signaling 13	2.77088	0.00440914		1.25726	0.162209		1.55029	0.159373
52	creb3l4	creb3l4	78284	NM_030080	cAMP responsive element binding protein 3-like 4	3.01879	0.897737		1.2565	0.0241931		1.43287	0.0696932
53	psmb5	psmb5,gm3375	19173	NM_011186	predicted gene 3375; proteasome (prosome, macropain) subunit, beta type 5	4.00803	0.116156		1.25596	0.0900266		2.33987	0.172912
54	rnf40	rnf40	233900	NM_172281	ring finger protein 40	2.87639	0.260626		1.25438	0.0111685		1.53959	0.0871078
55	utf1	utf1	22286	NM_009482	undifferentiated embryonic cell transcription factor 1	3.53243	0.363379		1.23903	0.0603962		1.27527	0.08344
56	ebf3	ebf3	13593	NM_010096	early B-cell factor 3	2.83658	0.674033		1.23655	0.0521842		1.407	0.0154692
57	pole	pole	18973	NM_011132	polymerase (DNA directed), epsilon	4.46769	0.454518		1.23534	0.289665		1.44683	0.0637181
58	mgat2	mgat2	217664	NM_146035	mannoside acetylglucosaminyltransferase 2	3.12743	0.232141		1.2352	0.00296908		1.22386	0.0265483
59	ifna14	ifna14,gm12597	404549	NM_206975	interferon alpha 14	2.40562	0.87225		1.23487	0.0601027		1.25409	0.522784
60	sbno2	stno2; bc019206	216161	NM_183426	strawberry notch homolog 2 (Drosophila)	3.34685	0.831079		1.2333	0.0345779		1.59714	0.166502
61	slc5a5	slc5a5	114479	NM_053248	solute carrier family 5 (sodium iodide symporter), member 5	2.96806	0		1.22603	0.148532		1.45372	0.0125648
62	pcna	pcna,loc100046823	18538	NM_011045	proliferating cell nuclear antigen; similar to proliferating cell nuclear antigen (DNA polymerase delta auxiliary protein)	4.39108	0.219833		1.223	0.0538885		1.70957	0.364252
63	psmb1	psmb1	19170	NM_011185	proteasome (prosome, macropain) subunit, beta type 1	2.7846	0.44386		1.22123	0.204952		1.57216	0.109502
64	olfr435	olfr435	258647	NM_146653	olfactory receptor 435	2.75955	0.0127042		1.21942	0.0126942		1.43051	0.0865702
65	ttc34	b230396o12rik	242800	NM_172878	B230396O12 gene	2.7806	2.023		1.21818	0		1.74158	0.132872
66	slc39a1	slc39a1	30791	NM_013901	solute carrier family 39 (zinc transporter), member 1; similar to Zinc transporter ZIP1 (Zinc-iron regulated transporter-like) (Solute carrier family 39 member 1)	4.55935	1.12682		1.21671	0.00567181		1.66842	0.173962
67	gstm4	gstm4	14865	NM_026764	glutathione S-transferase, mu 4	2.20683	0.00779202		1.21451	0.0822804		1.60752	0.0655912
68	psmc1	psmc1	19179	NM_008947	similar to peptidase (prosome, macropain) 26S subunit, ATPase 1; protease (prosome, macropain) 26S subunit, ATPase 1	2.16191	0.345937		1.21254	0.166218		2.68147	0.397924
69	serf2	serf2	378702	NM_011354	small EDRK-rich factor 2	3.75584	0.332018		1.21027	0.0285613		2.0985	0.231137
70	snrpc	snrpc,gm2991,loc677069	20630	NM_011432	similar to U1 small nuclear ribonucleoprotein C (U1 snRNP protein C) (U1C protein) (U1-C); predicted gene 2991; predicted gene 8849; predicted gene 8974; predicted gene 4674; U1 small nuclear ribonucleoprotein C	7.13417	0.80889		1.20976	0.0452923		3.7271	1.56722
71	usf2	usf2,loc100047980	100047980, 22282	NM_011680	similar to USF2; upstream transcription factor 2	3.66339	0.374404		1.20943	0.040274		1.62111	0.142537
72	pdlim3	pdlim3	53318	NM_016798	PDZ and LIM domain 3	3.12022	0.815315		1.20373	0.0383808		1.38144	0.0600906
73	vmn1r24	vmn1r24,vmn1r-ps20	171191	NM_134173	vomeronasal 1 receptor, C18; predicted gene 8370	2.52131	0.183068		1.20364	0.0573437		1.46493	0.242619
74	nup88	nup88	19069	NM_172394	nucleoporin 88	5.22871	0.554713		1.20274	0.0812981		1.43109	0.248667
75	ido2	ido2	209176	NM_145949	indoleamine 2,3-dioxygenase 2	2.6549	0.90432		1.20141	0.0320693		1.52444	0.151568
76	tmem60	tmem60	212090	NM_177601	transmembrane protein 60	3.65251	1.01523		1.19915	0.105951		2.14124	0.137923
77	snrnp70	snrnp70	20637	NM_009224	small nuclear ribonucleoprotein 70 (U1)	8.59337	1.5105		1.19915	0.0541479		3.15227	0.563573
78	edc4	edc4	234699	NM_181594	enhancer of mRNA decapping 4	2.6432	0.029873		1.19535	0.0417493		1.30031	0.0303707
79	hemt1	hemt1	15202	NM_010416	hematopoietic cell transcript 1	2.00343	0.00444018		1.19237	0.117628		1.45062	0.0287494
80	csde1	csde1,gm5064	229663	NM_144901	predicted gene 5064; cold shock domain containing E1, RNA binding	3.21637	0.441624		1.1911	0.0566792		1.469	0.368496
81	gsk3b	gsk3b	56637	NM_019827	glycogen synthase kinase 3 beta	2.7233	0.965506		1.19105	0		1.94456	0.923801
82	rph3al	rph3al	380714	NM_029548	rabphilin 3A-like (without C2 domains)	1.95622	0.00656473		1.18995	0.0175441		1.2426	0.0668609
83	hmox1	hmox1	15368	NM_010442	heme oxygenase (decycling) 1	3.25642	0.711283		1.1894	0.0527181		1.36134	0.0106165
84	zfp747	zfp747,loc638819	269997	NM_175560	similar to zinc finger protein HIT-39; zinc finger protein 747	2.78748	0		1.18897	0.12006		1.52454	0.238823
85	tdp1	tdp1	104884	NM_028354	tyrosyl-DNA phosphodiesterase 1	2.77784	0.767795		1.18801	0.0804877		1.49629	0.1443
86	hmg20a	hmg20a	66867	NM_025812	high mobility group 20A	3.19734	0.454687		1.18773	0.085333		1.3487	0.097838
87	g3bp1	g3bp1	27041	NM_013716	Ras-GTPase-activating protein SH3-domain binding protein 1	2.56022	0.55084		1.186	0.015112		1.22612	0.0473412
88	psmb7	psmb7	19177	NM_011187	proteasome (prosome, macropain) subunit, beta type 7	2.03549	0.183708		1.18467	0.0262935		1.67139	0.364224
89	mxd3	mad3; mxd3	17121	NM_016662	Max dimerization protein 3	4.08053	0.336112		1.18291	0.111094		1.33698	0.140362
90	ets1	ets1	23871	NM_011808	E26 avian leukemia oncogene 1, 5' domain	5.81697	1.76524		1.18278	0.0803881		1.80256	0.376085
91	plekhf1	plekhf1,gm7084	72287	NM_024413	predicted gene 7084; pleckstrin homology domain containing, family F (with FYVE domain) member 1	2.80488	0.391481		1.1825	0.075802		1.40095	0.2174
92	nkd2	nkd2	72293	NM_028186	naked cuticle 2 homolog (Drosophila)	3.08434	0.624951		1.18225	0.0709156		1.46223	0.01375
93	hspa9	hspa9	15526	NM_010481	heat shock protein 9	2.73003	0.575952		1.18025	0.128598		1.368	0.0993878
94	sfrs12	sfrs12	218543	NM_172592	splicing factor, arginine/serine-rich 12	2.55938	0.429902		1.18016	0.0062734		1.21777	0.0583309
95	xpo1	xpo1	103573	NM_134014	exportin 1, CRM1 homolog (yeast)	4.08127	0.184969		1.17877	0.108075		2.44074	0.174121
96	cacnb2	cacnb2	12296	NM_023116	calcium channel, voltage-dependent, beta 2 subunit	2.45535	0.906093		1.17733	0.0337118		1.56741	0.175264
97	alg9	alg9	102580	NM_133981	asparagine-linked glycosylation 9 homolog (yeast, alpha 1,2 mannosyltransferase)	3.52404	0.285139		1.17697	0.0265594		1.22948	0.0436209
98	cd151	cd151	12476	NM_009842	CD151 antigen	2.82177	0.0878687		1.17609	0.0319912		1.28939	0.131426
99	spa17	spa17	20686	NM_011449	sperm autoantigenic protein 17	2.18956	0.122065		1.17497	0.0780344		1.26276	0.00227732
100	stx4a	stx4a	20909	NM_009294	syntaxin 4A (placental)	2.13491	0.116434		1.17391	0.0967342		1.66146	0.138222
101	dhx9	dhx9	13211	NM_007842	DEAH (Asp-Glu-Ala-His) box polypeptide 9	2.05655	0.0806665		1.17377	0.0847713		1.42758	0.0543794
102	strap	strap	20901	NM_011499	serine/threonine kinase receptor associated protein	4.99681	0.951563		1.17208	0.00525345		1.33017	0.403002
103	pdk4	pdk4	27273	NM_013743	pyruvate dehydrogenase kinase, isoenzyme 4	2.92782	0.0229252		1.16937	0.0528304		1.29563	0.172967
104	2400001e08rik	gm13077,gm5510,2400001e08rik	66508	NM_025605	predicted gene 5510; RIKEN cDNA 2400001E08 gene; predicted gene 13077	17.0925	4.00227		1.16801	0.102922		8.06007	1.53021
105	ccdc134	ccdc134	76457	NM_172428	coiled-coil domain containing 134	3.04608	0.828255		1.16765	0.0424812		1.39351	0.0127313
106	sfrs7	sfrs7	225027	NM_146083	splicing factor, arginine/serine-rich 7	3.72018	0.107868		1.1676	0.0462936		1.55694	0.00637921
107	dab2ip	dab2ip	69601	NM_001001602	disabled homolog 2 (Drosophila) interacting protein	7.55473	1.89992		1.16603	0.097332		1.57959	0.486282
108	saps3	saps3	52036	NM_029456	SAPS domain family, member 3	2.83222	0.0559721		1.1656	0.0602934		2.19106	0.289145
109	paqr9	paqr9	75552	NM_198414	progestin and adipoQ receptor family member IX	2.51805	0.0975764		1.16484	0.114393		1.48861	0.101222
110	ifna9	ifna9	15972	NM_010507	interferon alpha 9	2.55418	0.723687		1.16352	0.104024		1.91882	0.44343
111	rcc1	rcc1	100088	NM_133878	regulator of chromosome condensation 1	2.12763	0.148387		1.16228	0.0341103		1.33441	0.0612622
112	pif1	pif1, ai449441	208084	NM_172453	PIF1 5'-to-3' DNA helicase homolog (S. cerevisiae)	2.67869	1.06516		1.16073	0.115668		1.20709	0.118712
113	pabpc1	pabpc1	18458	NM_008774	poly(A) binding protein, cytoplasmic 1	3.51724	0.996077		1.16056	0.00878404		5.24985	0.574158
114	slmo2	slmo2	66390	NM_025531	slowmo homolog 2 (Drosophila)	3.58674	1.0229		1.16036	0.00177776		1.75384	0.0885415
115	rnd1	rnd1	223881	NM_172612	Rho family GTPase 1	2.62137	0.0363997		1.16018	0.0279436		1.28358	0.104308
116	mrps10	mrps10	64657	NM_183086	mitochondrial ribosomal protein S10	3.59041	0.230788		1.15896	0.049453		1.48138	0.124872
117	cdh24	cdh24	239096	NM_199470	cadherin-like 24	2.92294	0.00228868		1.1587	0.0417229		1.24638	0.108265
118	slc10a4	slc10a4	231290	NM_173403	solute carrier family 10 (sodium/bile acid cotransporter family), member 4	2.27245	0.241453		1.15679	0.0901775		1.44269	0.0461578
119	tle3	tle3	21887	NM_009389	transducin-like enhancer of split 3, homolog of Drosophila E(spl)	2.23436	0.366137		1.15581	0.158537		1.37321	0.0368222
120	romo1	romo1	67067	NM_025946	reactive oxygen species modulator 1	3.48404	0.270331		1.15383	0.0321565		1.70527	0.0259054
121	relt	relt,loc677429	320100	NM_177073	RELT tumor necrosis factor receptor	2.1836	0.100539		1.15296	0.0271373		1.27094	0.0461802
122	appl1	appl1	72993	NM_145221	adaptor protein, phosphotyrosine interaction, PH domain and leucine zipper containing 1	2.66112	0.287842		1.15288	0.0454579		1.21939	0.0535365
123	pja2	pja2	224938	NM_144859	praja 2, RING-H2 motif containing	2.46334	0.402478		1.15031	0.0728073		1.57886	0.364109
124	kcnk10	1700024d23rik	72258	NM_029911	RIKEN cDNA 1700024B05 gene	3.89447	0.205903		1.14916	0.0778436		1.26026	0.0978224
125	c230096c10rik	c230096c10rik	230866	NM_146157	RIKEN cDNA C230096C10 gene	2.15477	0.117952		1.14914	0.0513767		1.44129	0.0706085
126	tssk2	tssk2	22115	NM_009436	testis-specific serine kinase 2	2.04656	0.162038		1.14913	0.00457455		1.79117	0.460132
127	tm4sf4	tm4sf4	229302	NM_145539	transmembrane 4 superfamily member 4	4.17848	0.173825		1.14881	0.0475724		1.30997	0.154693
128	ptp4a2	ptp4a2,gm13422	19244	NM_008974	protein tyrosine phosphatase 4a2	2.56813	1.06408		1.14842	0.0289548		1.2164	0.179159
129	s100g	s100g	12309	NM_009789	S100 calcium binding protein G	4.34891	0.178054		1.14818	0.0290683		1.47119	0.020254
130	nras	nras,loc100046704	18176	NM_010937	similar to neuroblastoma ras oncogene; neuroblastoma ras oncogene	2.34267	0.0144386		1.14762	0.0215986		1.27347	0.0758817
131	sfpq	sfpq,loc100045887	71514	NM_023603	splicing factor proline/glutamine rich (polypyrimidine tract binding protein associated); similar to PTB-associated splicing factor	4.58854	0.188263		1.14606	0.109175		2.72507	0.978182
132	mcm7	mcm7	17220	NM_008568	minichromosome maintenance deficient 7 (S. cerevisiae)	3.37742	0.00442427		1.14588	0.0423071		2.68065	0.147005
133	phb	phb,gm4773,1700071k01rik	18673	NM_008831	prohibitin; predicted gene 4773; RIKEN cDNA 1700071K01 gene	3.0801	0.718453		1.14588	0.0067539		1.64501	0.195048
134	cstad	cstad	78617	NM_030137	CSA-conditional, T cell activation-dependent protein	2.34474	0.15204		1.14562	0.0482032		1.3615	0.238253
135	fam118b	fam118b	109229	NM_175411	protein phosphatase 4, regulatory subunit 1-like; family with sequence similarity 118, member B	2.5982	0.586495		1.14433	0.0407783		1.45055	0.55259
136	med20	med20; usp49	56771	NM_020048	mediator complex subunit 20	2.89957	0.782119		1.14432	0.0201273		2.74316	2.04088
137	commd10	commd10	69456	NM_178377	COMM domain containing 10	2.31939	0.481256		1.14428	0.0627932		1.41095	0.191219
138	rhox3a	rhox3a,rhox3g,rhox3e	378429	NM_194063	reproductive homeobox 3E; reproductive homeobox 3G; reproductive homeobox 3A	4.14047	0		1.14374	0.0963052		1.26303	0.0176615
139	glra2	glra2	237213	NM_183427	glycine receptor, alpha 2 subunit	3.36171	0.162855		1.14349	0.0216956		1.53519	0.000220174
140	nploc4	nploc4	217365	NM_199469	nuclear protein localization 4 homolog (S. cerevisiae)	3.3485	0.22878		1.14256	0.0658491		1.33549	0.0199212
141	vmn1r195	vmn1r195	171257	NM_134223	vomeronasal 1 receptor, I6	2.7279	0.743097		1.14128	0.0516477		1.77599	0.25433
142	nlrp9a	nlrp9a	233001	NM_001048220	similar to NALP9A; NLR family, pyrin domain containing 9A	2.84027	0.115944		1.14098	0.028654		1.36754	0.0243621
143	tsc2	tsc2	22084	NM_011647	tuberous sclerosis 2	2.11954	0.036971		1.14082	0.0721616		1.82193	0.0363698
144	gkap1	gkap1	56278	NM_019832	G kinase anchoring protein 1	1.99704	0.0504056		1.14071	0.00557994		1.25788	0.02245
145	galns	galns	50917	NM_016722	galactosamine (N-acetyl)-6-sulfate sulfatase	3.11091	0.309448		1.14059	0.027991		1.30455	0.075021
146	pex14	pex14	56273	NM_019781	peroxisomal biogenesis factor 14	2.329	0.0468475		1.13964	0.0755387		1.42833	0.052209
147	metrnl	metrnl	210029	NM_144797	meteorin, glial cell differentiation regulator-like	2.06908	0.0966403		1.1391	0.061921		1.42176	0.110498
148	hnmt	hnmt	140483	NM_080462	histamine N-methyltransferase	2.48259	0.0746649		1.13805	0.0246406		1.33967	0.552823
149	nup107	nup107	103468	NM_134010	nucleoporin 107	3.13643	0.432048		1.13679	0.00430168		1.58336	0.255484
150	tada3	tada3,gm9109	101206, 668331	NM_133932	transcriptional adaptor 3 (NGG1 homolog, yeast)-like; predicted gene 9109	5.63976	0.952615		1.13655	0.0564665		1.92697	0.0492694
151	9930021d14rik	9930021d14rik	319259	NM_175682	RIKEN cDNA 9930021D14 gene	2.90241	0.450421		1.13643	0.0404569		1.35032	0.0408699
152	sart3	sart3	53890	NM_016926	squamous cell carcinoma antigen recognized by T-cells 3	2.56193	0.14354		1.13632	0.0672238		1.23649	0.436448
153	rorb	rorb,loc100047843	225998	NM_146095	hypothetical protein LOC100047843; RAR-related orphan receptor beta	2.11857	0.0414684		1.13484	0.0471009		1.65455	0.131336
154	fam26f	fam26f, a630077b13rik	215900	NM_175449	family with sequence similarity 26, member F	3.09206	2.01908		1.13444	0.0309087		1.34382	0.0728952
155	sbp	sbp	20234	NM_011321	spermine binding protein	2.42153	0.37366		1.1341	0.00561517		1.61446	0.0419962
156	slc35f5	slc35f5	74150	NM_028787	solute carrier family 35, member F5	2.74183	1.2919		1.13403	0.00554359		1.30183	0.198033
157	gli3	gli3	14634	NM_008130	GLI-Kruppel family member GLI3	2.46674	0.884215		1.13296	0.014194		1.23709	0.308071
158	1700029g01rik	1700029g01rik	66938	NM_025856	RIKEN cDNA 1700029G01 gene	2.93153	0.457016		1.13251	0.0774883		1.31774	0.024134
159	kcnip1	kcnip1	70357	NM_027398	Kv channel-interacting protein 1	2.55216	0.26351		1.13144	0.0519145		1.39689	0.136999
160	adora3	adora3	11542	NM_009631	adenosine A3 receptor	2.02946	0.0389436		1.12957	0.0259976		1.40572	0.146093
161	il1f5	il1f5	54450	NM_019451	interleukin 1 family, member 5 (delta)	4.28369	0.325481		1.12945	0.0380772		1.29322	0.0875667
162	olfr818	olfr818	258773	NM_146777	olfactory receptor 818	2.7048	0.551741		1.12768	0.0864255		1.2392	0.097634
163	otx2	otx2	18424	NM_144841	orthodenticle homolog 2 (Drosophila)	2.75617	0.936617		1.12742	0.0243554		1.37542	0.169726
164	rgs10	rgs10	67865	NM_026418	regulator of G-protein signalling 10	2.07267	0.251915		1.12732	0.032397		1.53743	0.00353631
165	olfr890	olfr890	258474	NM_146481	olfactory receptor 890	3.52182	0.0878377		1.12707	0.07867		1.5215	0.0564692
166	galnt9	galnt9	231605	NM_198306	UDP-N-acetyl-alpha-D-galactosamine:polypeptide N-acetylgalactosaminyltransferase 9	3.86864	0.715237		1.12674	0.0544313		1.41897	0.0126637
167	padi6	padi5; padi6	242726	NM_153106	peptidyl arginine deiminase, type VI	2.76912	0.18603		1.12653	0.0520716		1.35366	0.0452142
168	lrrc3	lrrc3	237387	NM_145152	leucine rich repeat containing 3	2.58414	0.205687		1.12639	0.146028		1.24218	0.201255
169	bub3	bub3	12237	NM_009774	budding uninhibited by benzimidazoles 3 homolog (S. cerevisiae)	2.33727	0.247682		1.12622	0.125798		1.87757	0.656275
170	tcerg1l	tcerg1l; 5730476p14rik	70571	NM_183289	transcription elongation regulator 1-like	2.61698	0.257986		1.12589	0.0118954		1.35182	0.0746591
171	rhod	rhod	11854	NM_007485	ras homolog gene family, member D	2.44901	0.181498		1.12498	0.0058627		1.6739	0.161436
172	1700020l24rik	1700020l24rik	66330	NM_025492	RIKEN cDNA 1700020L24 gene	3.87283	0.313454		1.12379	0.0390566		1.59427	0.0880267
173	hist1h1t	h1t; hist1h1t	107970	NM_010377	histone cluster 1, H1t	4.60892	0.488316		1.1233	0.0226455		1.78522	0.118193
174	rtkn	rtkn	20166	NM_009106	rhotekin	3.19227	0.727857		1.12308	0.0507731		1.58639	0.0773929
175	arap3	arap3	106952	NM_139206	ArfGAP with RhoGAP domain, ankyrin repeat and PH domain 3	3.89647	0.352548		1.1227	0.0379718		1.25416	0.0365059
176	c230052i12rik	c230052i12rik	101831	NM_178643	RIKEN cDNA C230052I12 gene	3.92964	0.116548		1.12161	0.115337		1.4705	0.188052
177	rspo4	rspo4, a930029k19rik	228770	NM_001040689	R-spondin family, member 4	2.75686	1.39041		1.12056	0.0170235		1.26815	0.0476098
178	kcnk13	kcnk13	217826	NM_146037	potassium channel, subfamily K, member 13	2.72613	0		1.12022	0.027371		1.35978	0.0480176
179	pola1	pola1	18968	NM_008892	polymerase (DNA directed), alpha 1	3.22793	1.06632		1.1197	0.0331369		1.94259	0.146547
180	ezh2	ezh2	14056	NM_007971	enhancer of zeste homolog 2 (Drosophila)	1.98728	0.0185766		1.11928	0.102789		1.77434	0.143788
181	olfr1445	olfr1445	258694	NM_146699	olfactory receptor 1445	2.47004	0.25157		1.11889	0.00859867		1.59956	0.0479106
182	vmn1r211	vmn1r211	171277	NM_134243	vomeronasal 1 receptor, H20	2.63615	0.232957		1.11846	0.0345943		1.27163	0.067295
183	d11wsu99e	gm12168,d11wsu99e	28081	NM_138598	DNA segment, Chr 11, Wayne State University 99, expressed; predicted gene 12168	3.45934	0.175805		1.11826	0.0125789		1.80289	0.0512008
184	mettl14	mettl14	210529	NM_201638	methyltransferase like 14	3.08944	0.371771		1.11773	0.0545083		1.40344	0.0677612
185	btc	btc	12223	NM_007568	betacellulin, epidermal growth factor family member	3.01278	0		1.1166	0.0432166		1.52405	0.20076
186	rab24	rab24	19336	NM_009000	RAB24, member RAS oncogene family	2.16882	0.360503		1.11562	0.116342		1.44842	0.0481287
187	il10rb	il10rb	16155	NM_008349	interleukin 10 receptor, beta	2.90456	1.01983		1.11559	0.0290237		1.4678	0.128168
188	psmb3	psmb3	26446	NM_011971	proteasome (prosome, macropain) subunit, beta type 3	3.63343	0.180292		1.1154	0.0311119		2.39747	0.0728681
189	tssk3	tssk3	117545	NM_080442	testis-specific serine kinase 3	3.3003	0.0989857		1.11534	0.0552991		1.26699	0.0398506
190	b3gnt9	b3gnt9	97440	NM_178879	UDP-GlcNAc:betaGal beta-1,3-N-acetylglucosaminyltransferase 9	2.75989	0.38086		1.11488	0.105561		1.3834	0.0284311
191	cdk17	cdk17	237459	NM_146239	PCTAIRE-motif protein kinase 2	3.2265	1.00719		1.114	0.111003		2.06295	0.133707
192	pex11c	pex11c	69129	NM_026951	peroxisomal biogenesis factor 11 gamma	2.34215	0.00188967		1.11393	0.0320263		1.46068	0.129161
193	uqcr10	uqcr10,gm6293	66152	NM_197979	RIKEN cDNA 1110020P15 gene; predicted gene 6293	2.12002	0.0420764		1.11119	0.0103003		2.03737	0.0150987
194	fam126a	fam126a	84652	NM_053090	family with sequence similarity 126, member A	2.121	0.243201		1.11053	0.0360817		1.38276	0.257224
195	odf2	odf2,loc100047199	18286	NM_013615	outer dense fiber of sperm tails 2; similar to outer dense fiber of sperm tails 2	2.15217	0.0368382		1.11022	0.0198758		1.20774	0.0964767
196	acox1	acox1	11430	NM_015729	acyl-Coenzyme A oxidase 1, palmitoyl	2.94386	1.3973		1.11004	0.0413382		1.36237	0.119176
197	adhfe1	adhfe1	76187	NM_175236	alcohol dehydrogenase, iron containing, 1	2.35294	0.250474		1.1099	0.000393234		1.2762	0.0012117
198	asb13	asb13	142688	NM_080857	ankyrin repeat and SOCS box-containing 13	3.22521	0.371276		1.10965	0.00149763		1.21975	0.0427583
199	3830406c13rik	3830406c13rik	218734	NM_146051	RIKEN cDNA 3830406C13 gene	2.27888	0.354046		1.10957	0.0363737		1.53667	0.0523091
200	kcne4	kcne4	57814	NM_021342	potassium voltage-gated channel, Isk-related subfamily, gene 4	4.11695	0		1.10812	0.123849		1.36899	0.166139
201	zfp420	zfp420	233058	NM_172740	zinc finger protein 420	3.07388	0		1.10741	0.0184131		1.26252	0.0255183
202	pld3	pld3	18807	NM_011116	phospholipase D family, member 3	2.54443	0.113027		1.10729	0.00952169		1.39927	0.210806
203	zfp647	zfp647	239546	NM_172817	zinc finger protein 647	3.58095	0		1.10694	0.0808311		1.35005	0.0199782
204	pabpc4	pabpc4,gm12623,gm5088,loc100044219	230721	NM_130881	similar to Poly A binding protein, cytoplasmic 4; poly(A) binding protein, cytoplasmic 4; predicted gene 12623; predicted gene 5088; hypothetical protein LOC100044219	3.30598	0.0283334		1.10671	0.0057852		1.24261	0.240509
205	atad3a	atad3a	108888	NM_179203	ATPase family, AAA domain containing 3A	2.31208	0.450927		1.10493	0.0599285		1.21582	0.0178068
206	zfp352	zfp352	236537	NM_153102	zinc finger protein 352	4.46733	0.905922		1.10473	0.0470415		1.29681	0.0616248
207	foxl2	foxl2	26927	NM_012020	forkhead box L2	2.68253	0		1.10421	0.0401145		2.32612	0.129649
208	prkar1a	prkar1a	19084	NM_021880	protein kinase, cAMP dependent regulatory, type I, alpha	3.29893	0.711433		1.10398	0.0819637		4.25366	0.609699
209	thrap3	trap150,thrap3,gm5898	545971, 230753	NM_146153	thyroid hormone receptor associated protein 3; predicted gene 5898	5.75295	1.21615		1.10387	0.0757419		1.20675	0.0869356
210	nmnat2	nmnat2	226518	NM_175460	nicotinamide nucleotide adenylyltransferase 2	2.79376	0.92629		1.10383	0.0226441		1.46008	0.224893
211	cyp26b1	cyp26b1	232174	NM_175475	cytochrome P450, family 26, subfamily b, polypeptide 1	2.70345	0.691913		1.1038	0.0869333		1.46122	0.560712
212	auh	auh	11992	NM_016709	AU RNA binding protein/enoyl-coenzyme A hydratase	2.27794	0.196121		1.10371	0.0688078		1.49783	0.188313
213	asah1	asah1	11886	NM_019734	N-acylsphingosine amidohydrolase 1	2.99712	1.48408		1.10281	0.0693289		2.57822	0.16758
214	mrpl49	mrpl49,loc100048603	18120	NM_026246	mitochondrial ribosomal protein L49; similar to mitochondrial ribosomal protein L49	2.76812	0.627422		1.10267	0.0327732		1.29532	0.0751221
215	dhx38	dhx38	64340	NM_178380	DEAH (Asp-Glu-Ala-His) box polypeptide 38	7.07292	0.0236107		1.10179	0.0374158		1.36321	0.108694
216	vmn1r28	vmn1r28	171198	NM_134180	vomeronasal 1 receptor, C25	3.37392	0.49549		1.10142	0.0456576		1.24878	0.0507656
217	etf1	etf1	225363	NM_144866	eukaryotic translation termination factor 1	1.99967	0.0956119		1.10064	0.0104181		1.55608	0.166155
218	vcp	vcp,loc675857	269523	NM_009503	valosin containing protein	2.59112	1.12809		1.10053	0.0534124		1.77441	0.0760175
219	ube3c	ube3c	100763	NM_133907	ubiquitin protein ligase E3C	6.13859	2.945		1.09969	0.0217077		1.4533	0.388582
220	chchd10	chchd10	103172	NM_175329	coiled-coil-helix-coiled-coil-helix domain containing 10	3.7421	0.803251		1.09958	0.00118035		1.85696	0.113675
221	ugt2b35	ugt2b35	243085	NM_172881	UDP glucuronosyltransferase 2 family, polypeptide B35	2.86623	0.487199		1.09926	0.0372225		1.28627	0.0237273
222	lce1f	lce1f	67828	NM_026394	late cornified envelope 1F	2.42782	0.552428		1.09877	0.0181721		1.22219	0.0151517
223	dpp7	dpp7	83768	NM_031843	dipeptidylpeptidase 7	2.28823	0.044749		1.09848	0.0215156		1.27834	0.0311289
224	fhl4	fhl4	14202	NM_010214	four and a half LIM domains 4	3.53435	0.560147		1.09843	0.0425469		1.82941	0.306243
225	asb10	asb10	117590	NM_080444	ankyrin repeat and SOCS box-containing 10	2.4985	0.178526		1.09671	0.104509		1.61317	0.0943773
226	1110032a04rik	1110032a04rik	66183	NM_133675	RIKEN cDNA 1110032A04 gene	2.45717	0.593209		1.09642	0.0135798		1.22117	0.00672919
227	crmp1	crmp1	12933	NM_007765	collapsin response mediator protein 1	3.03201	0.258431		1.09614	0.059749		1.7102	0.145247
228	hdac6	hdac6	15185	NM_010413	histone deacetylase 6	2.15323	0.195242		1.09588	0.0244059		1.54631	0.0242452
229	vps37d	vps37d	194309	NM_177574	vacuolar protein sorting 37D (yeast)	3.68357	1.39398		1.09507	0.0961289		1.39121	0.127699
230	fam131a	fam131a	78408	NM_133778	family with sequence similarity 131, member A	2.97371	0.2625		1.0949	0.0282919		1.68487	0.00919091
231	olfr178	olfr178	258999	NM_146997	olfactory receptor 178	4.14347	0.103651		1.09437	0.0543411		1.25167	0.214417
232	cenpb	cenpb	12616	NM_007682	centromere protein B	2.65383	0.290428		1.09348	0.00351301		1.21499	0.0191562
233	ngfr	ngfr	18053	NM_033217	nerve growth factor receptor (TNFR superfamily, member 16)	2.16005	0.322662		1.09346	0.0259751		1.30798	0.0380572
234	palm	palm	18483	NM_023128	paralemmin	2.37066	0.480216		1.09264	0.0134324		1.30546	0.339194
235	cyb561	cyb561	13056	NM_007805	cytochrome b-561	4.17475	0.658027		1.09203	0.0070936		1.30389	0.0541071
236	kcnb2	kcnb2	98741	NM_001098528	potassium voltage gated channel, Shab-related subfamily, member 2	3.61446	0.204928		1.09193	0.0232542		1.31956	0.08174
237	stk38	stk38	106504	NM_134115	serine/threonine kinase 38	2.40472	0.622789		1.09113	0.0113358		1.22122	0.0290207
238	dmbx1	otx3, dmbx1	140477	NM_001025567	diencephalon/mesencephalon homeobox 1	3.20525	1.66269		1.09076	0.0468194		1.43696	0.188722
239	esrp2	esrp2	77411	NM_176838	epithelial splicing regulatory protein 2	2.65358	0.836838		1.09073	0.0323419		1.71576	0.181297
240	idh3g	idh3g	15929	NM_008323	isocitrate dehydrogenase 3 (NAD+), gamma	2.71588	0.0424461		1.09058	0.0304603		1.325	0.0573053
241	olfr1043	olfr1043	258570	NM_146577	olfactory receptor 1043	2.52885	0.270297		1.08989	0.0651636		1.21521	0.0680848
242	copb1	copb1	70349	NM_033370	coatomer protein complex, subunit beta 1	2.84843	0.47273		1.08989	0.0200618		1.23084	0.102912
243	cd164	cd164	53599	NM_016898	CD164 antigen	5.0628	0.0303182		1.0895	0.0548258		1.39658	0.126642
244	atp6v0d2	atp6v0d2	242341	NM_175406	ATPase, H+ transporting, lysosomal V0 subunit D2	4.53069	0		1.08948	0.0811556		1.44098	0.132522
245	tapt1	tapt1	231225	NM_173764	transmembrane anterior posterior transformation 1	2.72696	0.497071		1.0892	0.0749187		1.27505	0.0722053
246	0610040j01rik	0610040j01rik	76261	NM_029554	RIKEN cDNA 0610040J01 gene	2.9872	0.732163		1.0876	0.00666749		1.22437	0.0147773
247	dlst	dlst	78920	NM_030225	dihydrolipoamide S-succinyltransferase (E2 component of 2-oxo-glutarate complex)	2.41615	0.122728		1.08746	0.00714705		1.62856	0.215987
248	hip1	hip1	215114	NM_146001	huntingtin interacting protein 1	6.51241	0.199684		1.08646	0.0619597		1.49313	0.0167849
249	pphln1	pphln1	223828	NM_146062	periphilin 1	2.79744	0		1.08595	0.00674329		1.68794	0.177229
250	agpat6	agpat6	102247	NM_018743	1-acylglycerol-3-phosphate O-acyltransferase 6 (lysophosphatidic acid acyltransferase, zeta)	3.78561	0.0460081		1.08593	0.0172686		1.23118	0.0167566
251	grid2	grid2	14804	NM_008167	glutamate receptor, ionotropic, delta 2	2.9228	0.237343		1.08579	0.00474513		1.24207	0.102326
252	rnf151	rnf151	67504	NM_026205	ring finger protein 151	2.4698	0.469048		1.08564	0.0383182		1.54923	0.196443
253	cox5b	cox5b,gm11273,loc100046079	12859	NM_009942	similar to cytochrome c oxidase, subunit Vb; predicted gene 11273; cytochrome c oxidase, subunit Vb	2.15866	0.320525		1.08553	0.0137662		1.64616	0.0477974
254	tssk1	tssk1	22114	NM_009435	testis-specific serine kinase 1	3.5074	0.269157		1.08495	0.0208903		1.41813	0.132433
255	fgg	fgg	99571	NM_133862	fibrinogen gamma chain	2.17391	0.0908216		1.08483	0.0162591		1.29669	0.0370601
256	4931406b18rik	4931406b18rik	74054	NM_028737	RIKEN cDNA 4931406B18 gene	3.51287	1.65237		1.08416	0.00617582		1.35351	0.125494
257	gpi1	gpi1	14751	NM_008155	glucose phosphate isomerase 1	2.32561	0.124364		1.08411	0.0071758		1.3716	0.0550879
258	wfikkn2	wfikkn2	278507	NM_181819	WAP, follistatin/kazal, immunoglobulin, kunitz and netrin domain containing 2	2.00792	0.115556		1.08382	0.0237851		1.409	0.0631817
259	npy5r	npy5r	18168	NM_016708	neuropeptide Y receptor Y5	2.53315	1.26564		1.08364	0.0361293		1.25434	0.450414
260	nuak1	nuak1	77976	NM_001004363	NUAK family, SNF1-like kinase, 1	2.94183	0.166759		1.08303	0.0182084		1.34825	0.0546204
261	mtnr1b	mtnr1b	244701	NM_145712	melatonin receptor 1B	3.09134	1.91783		1.08149	0.0399112		1.48719	0.0355259
262	nt5c	nt5c	50773	NM_015807	5',3'-nucleotidase, cytosolic	2.3195	0.154065		1.08113	0.0316953		1.30415	0.211988
263	klk1b21	klk1b21	16616	NM_010642	kallikrein 1-related peptidase b21	2.54859	0.714463		1.08048	0.000692948		1.40755	0.0388423
264	fdx1	fdx1	14148	NM_007996	ferredoxin 1	2.5662	0.0175091		1.08038	0.0205394		1.44929	0.0989327
265	cd52	cd52	23833	NM_013706	CD52 antigen	3.96031	1.4309		1.07997	0.0969017		1.70599	0.360563
266	uqcrfs1	uqcrfs1	66694	NM_025710	ubiquinol-cytochrome c reductase, Rieske iron-sulfur polypeptide 1	2.61246	0.0720421		1.07989	0.00390276		1.41024	0.064423
267	nsun7	nsun7,loc100047299	70918	NM_027602	similar to NOL1/NOP2/Sun domain family, member 7; NOL1/NOP2/Sun domain family, member 7	3.95126	1.30771		1.07858	0.0655796		1.51087	0.0646341
268	npy1r	npy1r	18166	NM_010934	neuropeptide Y receptor Y1	3.41064	1.12091		1.07853	0.021994		1.30911	0.0219463
269	olfr1317	olfr1317	258440	NM_146448	olfactory receptor 1317	2.94758	0.154845		1.07803	0.0347924		1.23947	0.129656
270	fam187b	fam187b	76415	NM_175240	transmembrane protein 162	3.45549	0		1.07799	0.0159514		1.22098	0.0325691
271	atp5sl	atp5sl	66349	NM_025504	ATP5S-like	2.87574	1.10331		1.07786	0.0109647		1.32554	0.0496978
272	rnf215	rnf215	71673	NM_027859	ring finger protein 215	2.48545	0.255586		1.07678	0.0379852		1.21945	0.0068246
273	march6*	"march6"	223455	NM_172606	membrane-associated ring finger (C3HC4) 6	3.13835	1.00222		1.07634	0.00275388		1.65367	0.0842234
274	cdc25b	cdc25b	12531	NM_023117	cell division cycle 25 homolog B (S. pombe)	3.47376	1.33455		1.07606	0.0342718		1.31932	0.115692
275	olfr888	olfr888	258416	NM_146424	olfactory receptor 888	2.43693	0.156961		1.07604	0.0391495		1.27623	0.132357
276	cdca3	cdca3	14793	NM_013538	cell division cycle associated 3	3.3088	0.558494		1.07475	0.0155714		1.6789	0.0875193
277	ddc	ddc	13195	NM_016672	dopa decarboxylase	2.68112	0		1.07449	0.0273428		1.38728	0.179686
278	ccdc32	ccdc32	269336	NM_199310	coiled-coil domain containing 32	2.20094	0.1824		1.07447	0.0223554		1.39289	0.0803448
279	comt1	comt1	12846	NM_007744	catechol-O-methyltransferase 1	4.17361	0.468563		1.07314	0.0153422		2.27239	0.327176
280	smpd3	smpd3	58994	NM_021491	sphingomyelin phosphodiesterase 3, neutral	2.41743	0.752609		1.07258	0.0173099		1.33921	0.216592
281	5730528l13rik	5730528l13rik	66665	NM_028137	RIKEN cDNA 5730528L13 gene	2.7267	0.341631		1.07256	0.0121735		2.11466	0.214976
282	prph2	prph2	19133	NM_008938	peripherin 2	3.60103	1.62649		1.07166	0.015721		1.32981	0.0765035
283	hgs	hgs	15239	NM_008244	HGF-regulated tyrosine kinase substrate	2.9469	0.170928		1.07123	0.0217948		1.6075	0.447576
284	akr1b7	akr1b7	11997	NM_009731	aldo-keto reductase family 1, member B7	2.2364	0.384509		1.0706	0.0436275		1.4031	0.130438
285	ddb2	ddb2	107986	NM_028119	damage specific DNA binding protein 2	2.27851	0.433656		1.07045	0.0433294		1.29167	0.168259
286	wnt7b	wnt7b	22422	NM_009528	wingless-related MMTV integration site 7B	2.45973	0.0944941		1.07002	0.00596439		1.50564	0.081594
287	magea6	magea6	17142	NM_020019	melanoma antigen, family A, 6	2.73775	0.668124		1.06837	0.0209198		1.33419	0.326092
288	yipf1	yipf1	230584	NM_145550	Yip1 domain family, member 1	2.50146	0.745621		1.06754	0.0329892		1.4043	0.0656556
289	sectm1a	sectm1a	209588	NM_145373	secreted and transmembrane 1A	3.15822	0.200752		1.06686	0.017427		1.39367	0.0864714
290	pcdh15	pcdh15	11994	NM_023115	protocadherin 15	3.97125	2.33443		1.0658	0.00719038		1.25846	0.0834304
291	1700028p14rik	1700028p14rik,loc100044197	67483	NM_026188	hypothetical protein LOC100044197; RIKEN cDNA 1700028P14 gene	3.12596	0.373691		1.06494	0.0440971		1.46581	0.0185455
292	gsta1	gsta1	14857	NM_008181	glutathione S-transferase, alpha 1 (Ya)	2.69913	0.800668		1.06422	0.0277506		1.33669	0.0208525
293	rxfp4	rxfp4	242093	NM_181817	relaxin family peptide receptor 4	2.11639	0.200941		1.06342	0.0246223		1.58482	0.169377
294	wars	wars,loc640248	22375	NM_011710	tryptophanyl-tRNA synthetase; similar to tryptophanyl-tRNA synthetase	2.71974	0.390531		1.06316	0.0188765		1.43902	0.0948037
295	ppip5k1	hisppd2a, b430315c20rik	327655	NM_178795	histidine acid phosphatase domain containing 2A	2.98866	2.14377		1.06286	0.0644587		1.30103	0.017527
296	cxcr3	cxcr3,loc100047702	12766	NM_009910	chemokine (C-X-C motif) receptor 3	2.39014	0.248922		1.06243	0.0523343		1.26277	0.107341
297	pgrmc1	pgrmc1	53328	NM_016783	progesterone receptor membrane component 1	3.8179	0.91062		1.06185	0.032413		1.71433	0.0310428
298	insrr	insrr	23920	NM_011832	insulin receptor-related receptor	2.23455	0.191789		1.06163	0.0247404		1.2602	0.108926
299	lin9	lin9	72568	NM_001103182	lin-9 homolog (C. elegans)	*	*		3.01555	0		2.4046	0.280725
300	setd8	setd8,gm8590	67956	NM_030241	SET domain containing (lysine methyltransferase) 8; predicted gene 8590	*	*		2.84133	0		4.11318	1.90726
301	foxo1	foxo1	56458	NM_019739	forkhead box O1	*	*		2.77062	0		1.38388	0.0733935
302	usp46	usp46	69727	NM_177561	ubiquitin specific peptidase 46	*	*		2.54909	0		1.50526	0.301167
303	foxm1	foxm,14933413g19rik	71149	NM_008021	forkhead box M1; RIKEN cDNA 4933413G19 gene	*	*		2.50793	0		1.4343	0.110626
304	foxk1	foxk1	17425	NM_199068	forkhead box K1	*	*		2.13586	0		1.65215	0.315221
305	smc4	smc4	70099	NM_133786	structural maintenance of chromosomes 4	*	*		2.07294	0		1.92533	0.482149
306	cdkn1a	p21	12575	NM_007669	cyclin-dependent kinase inhibitor 1A (P21)	*	*		2.03235	0		1.70683	0.272052
307	rps6kc1	rps6kc1	320119	NM_178775	ribosomal protein S6 kinase polypeptide 1	*	*		1.90426	0		1.61881	0.0904978
308	ccne1	ccne1	12447	NM_007633	cyclin E1	*	*		1.90426	0		1.23585	0.423449
309	ttbk2	ttbk2,cdan1	140810	NM_080788	tau tubulin kinase 2; congenital dyserythropoietic anemia, type I (human)	*	*		1.69528	0		1.6721	0.1017
310	ddr1	ddr1	12305	NM_172962	discoidin domain receptor family, member 1	*	*		1.68749	0		1.23393	0.0201962
311	dapk1	dapk1	69635	NM_134062	death associated protein kinase 1	*	*		1.68154	0		1.50672	0.124764
312	etv5	etv5	104156	NM_023794	etv5	29.766	11.3191		1.51531	0.252874		2.57671	0.979255
313	h2afz	h2a.z,gm8203*	666634	NM_016750	H2A histone family, member Z; predicted gene 6722; predicted gene 8203	*	*		1.36757	0		1.9547	0.282225
314	dnmt1	dnmt1	13433	NM_010066	DNA methyltransferase (cytosine-5) 1	*	*		1.1745	0		1.2325	0.127103
315	etv2	etv2,loc100047965	100047965	NM_007959	similar to ETS related protein 71; ets variant gene 2	*	*		1.1221	0		1.25026	0.257713
316	elf1	elf1	13709	NM_007920	E74-like factor 1	*	*		1.11568	0		1.50659	0.183829

## Sheet: Legend
Table S4. Positive hits identified in both of the validation siRNA screens.
Column	Term	Nomenclature
A	Ranking	hits ranked by Rex1 validation screen score
B	Offical_Gene_Symbol	official gene symbol
C	Alternative_symbols	alternative associated gene symbols
D	Entrez_Gene_ID	gene ID from Entrez Gene database
E	RefSeq_mRNA	mRNA ID from NCBI Reference Sequence database
F	Gene_Name	gene name description
G	primary_ava	mean of replica z score in primary screen
H	primary_se	standard error of mean in primary screen
J	rex1_ava	mean of replica gfp ratio in validation (Rex1GFPd2 cells) screen
K	rex1_se	standard error of mean in validation (Rex1GFPd2 cells) screen
M	oct4_ava	mean of replica gfp ratio in validation (Oct4GFP cells) screen
N	oct4_se	standard error of mean in validation (Oct4GFP cells) screen
